# Supplementary material for: Fasting alters the gut microbiome reducing blood pressure and body weight in metabolic syndrome patients
Source: PubMed Central journal article supplement (PMC8010079; doi:10.1038/s41467-021-22097-0), 2021-03-30
Supplement: 41467_2021_22097_MOESM3_ESM.pdf [file 41467_2021_22097_MOESM3_ESM.pdf]

## **Description of Additional Supplementary Files**

### **Supplementary Data 1**

Alpha diversities of the microbiome data.

### **Supplementary Data 2**

Univariate analysis of the fasting+DASH group.

### **Supplementary Data 3**

Drug data.

### **Supplementary Data 4**

Blood pressure responsiveness.

### **Supplementary Data 5**

BMI adjusted univariate analysis.

### **Supplementary Data 6**

Comparison of clinical characteristics of BP responders and non-responders at baseline of the fasting+DASH arm.

### **Supplementary Data 7**

Univariate analysis of the Responders in the fasting+DASH arm.

### **Supplementary Data 8**

Univariate analysis of the DASH arm.

### **Supplementary Data 9**

Triangulation analysis.

### **Supplementary Data 10**

References for poorly characterized SCFA-producing microbes.

### **Supplementary Data 11**

Re-analysis of the Mesnage data.

### **Supplementary Data 12**

Classification of the volunteers of the Mesnage dataset according to their BP decrease after three months. A  $\geq 5$  mmHg decrease of the SBP at three months compared to baseline was considered to be significant.

### **Supplementary Data 13**

Review of the studies related investigating the relation of dietary interventions, gut microbiome and metabolic diseases, including (cardiovascular) health, MetS, diabetes, obesity.

### **Supplementary Data 14**

Mapping statistics for human contamination, IGC, refMG and mOTUs2 using ngless and bwa.
