# Supplementary material for: Fasting alters the gut microbiome reducing blood pressure and body weight in metabolic syndrome patients
Source: PubMed Central journal article supplement (PMC8010079; doi:10.1038/s41467-021-22097-0), 2021-03-30
Supplement: 41467_2021_22097_MOESM5_ESM.pdf [file 41467_2021_22097_MOESM5_ESM.pdf]

## Fasting+ DASH

| Feature        | Space                | Fasting effect | Recovery effect | Study effect | FDR (intervention model comparison) | Fasting effect size (Cliff's delta) | Fasting FDR (MWU post-hoc, N=3) | Recovery effect size (Cliff's delta) | Recovery FDR (MWU post-hoc, N=3) | Study effect size (Cliff's delta) | Study FDR (MWU post-hoc, N=3) | Signal        |
|----------------|----------------------|----------------|-----------------|--------------|-------------------------------------|-------------------------------------|---------------------------------|--------------------------------------|----------------------------------|-----------------------------------|-------------------------------|---------------|
| Shannon        | Microbiome-Diversity | NS             | NS              | NS           | 0.873                               | -0.217                              | 0.269                           | 0.217                                | 0.209                            | -0.043                            | 0.870                         | INSIGNIFICANT |
| InverseSimpson | Microbiome-Diversity | NS             | NS              | NS           | 0.570                               | -0.391                              | 0.147                           | 0.391                                | 0.147                            | -0.130                            | 0.360                         | INSIGNIFICANT |
| Richness       | Microbiome-Diversity | NS             | NS              | NS           | 0.535                               | -0.391                              | 0.604                           | -0.043                               | 0.651                            | -0.043                            | 0.604                         | INSIGNIFICANT |
| Chao1          | Microbiome-Diversity | NS             | NS              | NS           | 0.449                               | -0.130                              | 0.501                           | -0.043                               | 0.501                            | -0.217                            | 0.402                         | INSIGNIFICANT |
| Simpson        | Microbiome-Diversity | NS             | NS              | NS           | 0.570                               | -0.391                              | 0.098                           | 0.391                                | 0.098                            | -0.130                            | 0.482                         | INSIGNIFICANT |
| Eveness        | Microbiome-Diversity | NS             | NS              | NS           | 0.570                               | -0.130                              | 0.240                           | 0.478                                | 0.054                            | 0.130                             | 0.917                         | INSIGNIFICANT |

## Fasting+DASH responders only

| Feature        | Space                | Fasting effect | Recovery effect | Study effect | FDR (intervention model comparison) | Fasting effect size (Cliff's delta) | Fasting FDR (MWU post-hoc, N=3) | Recovery effect size (Cliff's delta) | Recovery FDR (MWU post-hoc, N=3) | Study effect size (Cliff's delta) | Study FDR (MWU post-hoc, N=3) | Signal        |
|----------------|----------------------|----------------|-----------------|--------------|-------------------------------------|-------------------------------------|---------------------------------|--------------------------------------|----------------------------------|-----------------------------------|-------------------------------|---------------|
| Chao1          | Microbiome-Diversity | NS             | NS              | NS           | 0.684                               | 0.067                               | 0.890                           | -0.067                               | 0.842                            | -0.333                            | 0.623                         | INSIGNIFICANT |
| Shannon        | Microbiome-Diversity | NS             | NS              | NS           | 0.956                               | -0.200                              | 0.733                           | 0.200                                | 0.563                            | 0.067                             | 0.934                         | INSIGNIFICANT |
| InverseSimpson | Microbiome-Diversity | NS             | NS              | NS           | 0.684                               | -0.600                              | 0.124                           | 0.333                                | 0.188                            | -0.333                            | 0.181                         | INSIGNIFICANT |
| Richness       | Microbiome-Diversity | NS             | NS              | NS           | 0.684                               | -0.200                              | 0.955                           | 0.000                                | 0.955                            | 0.067                             | 0.955                         | INSIGNIFICANT |
| Eveness        | Microbiome-Diversity | NS             | NS              | NS           | 0.956                               | -0.200                              | 0.539                           | 0.333                                | 0.284                            | 0.067                             | 0.847                         | INSIGNIFICANT |
| Simpson        | Microbiome-Diversity | NS             | NS              | NS           | 0.684                               | -0.600                              | 0.181                           | 0.333                                | 0.181                            | -0.333                            | 0.277                         | INSIGNIFICANT |

## DASH only

| Feature        | Space                | Fasting effect | Recovery effect | Study effect | FDR (intervention model comparison) | Fasting effect size (Cliff's delta) | Fasting FDR (MWU post-hoc, N=3) | Recovery effect size (Cliff's delta) | Recovery FDR (MWU post-hoc, N=3) | Study effect size (Cliff's delta) | Study FDR (MWU post-hoc, N=3) | Signal        |
|----------------|----------------------|----------------|-----------------|--------------|-------------------------------------|-------------------------------------|---------------------------------|--------------------------------------|----------------------------------|-----------------------------------|-------------------------------|---------------|
| Richness       | Microbiome-Diversity | NS             | NS              | NS           | 0.506                               | -0.043                              | 0.594                           | 0.174                                | 0.518                            | 0.130                             | 0.594                         | INSIGNIFICANT |
| InverseSimpson | Microbiome-Diversity | NS             | NS              | NS           | 0.136                               | 0.391                               | 0.227                           | -0.043                               | 0.870                            | 0.130                             | 0.227                         | INSIGNIFICANT |
| Simpson        | Microbiome-Diversity | NS             | NS              | NS           | 0.136                               | 0.391                               | 0.480                           | -0.043                               | 0.893                            | 0.130                             | 0.840                         | INSIGNIFICANT |
| Chao1          | Microbiome-Diversity | NS             | NS              | NS           | 0.293                               | -0.130                              | 0.501                           | 0.130                                | 0.480                            | 0.304                             | 0.501                         | INSIGNIFICANT |
| Shannon        | Microbiome-Diversity | NS             | NS              | NS           | 0.148                               | 0.304                               | 0.517                           | 0.043                                | 0.964                            | 0.130                             | 0.517                         | INSIGNIFICANT |
| Eveness        | Microbiome-Diversity | NS             | NS              | NS           | 0.148                               | 0.391                               | 0.494                           | -0.043                               | 0.665                            | 0.130                             | 0.494                         | INSIGNIFICANT |

## Fasting+DASH, responders vs. non-responders

| Feature        | Space                | Baseline | Fasting | Followup | Baseline responder MWU P | Baseline responder FDR | Baseline responder effect size (Cliff's delta) | Fasting responder MWU P | Fasting responder FDR | Fasting responder effect size (Cliff's delta) | Followup responder MWU P | Followup responder FDR | Followup responder effect size (Cliff's delta) |
|----------------|----------------------|----------|---------|----------|--------------------------|------------------------|------------------------------------------------|-------------------------|-----------------------|-----------------------------------------------|--------------------------|------------------------|------------------------------------------------|
| Richness       | Microbiome-Diversity | NS       | NS      | NS       | 0.724                    | 0.071                  | -0.105                                         | 0.916                   | 0.046                 | 0.038                                         | 0.621                    | 0.000                  | -0.142857143                                   |
| Simpson        | Microbiome-Diversity | NS       | NS      | NS       | 0.447                    | 0.650                  | 0.219                                          | 0.837                   | 0.907                 | 0.067                                         | 0.891                    | 0.000                  | -0.047619048                                   |
| Eveness        | Microbiome-Diversity | NS       | NS      | NS       | 0.581                    | 0.650                  | 0.162                                          | 0.490                   | 0.907                 | 0.200                                         | 0.731                    | 0.001                  | -0.104761905                                   |
| Shannon        | Microbiome-Diversity | NS       | NS      | NS       | 0.731                    | 0.650                  | 0.105                                          | 0.407                   | 0.700                 | 0.238                                         | 0.891                    | 0.000                  | -0.047619048                                   |
| Chao1          | Microbiome-Diversity | NS       | NS      | NS       | 1.000                    | 0.212                  | 0.010                                          | 0.945                   | 0.046                 | -0.029                                        | 0.731                    | 0.000                  | -0.104761905                                   |
| InverseSimpson | Microbiome-Diversity | NS       | NS      | NS       | 0.447                    | 0.716                  | 0.219                                          | 0.837                   | 0.092                 | 0.067                                         | 0.891                    | 0.000                  | -0.047619048                                   |
