# Supplementary material for: Fasting alters the gut microbiome reducing blood pressure and body weight in metabolic syndrome patients
Source: PubMed Central journal article supplement (PMC8010079; doi:10.1038/s41467-021-22097-0), 2021-03-30
Supplement: 41467_2021_22097_MOESM9_ESM.pdf [file 41467_2021_22097_MOESM9_ESM.pdf]

**Supplementary Data 6. Comparison of clinical characteristics of BP responders and non-responders at baseline of the fasting+DASH arm.**

|                                             | <b>Responders<br/>median</b> | <b>Non-<br/>responders<br/>Median</b> | <b>MWU P<br/>value</b> | <b>FDR-<br/>adjusted P<br/>value</b> |
|---------------------------------------------|------------------------------|---------------------------------------|------------------------|--------------------------------------|
| Age (year)                                  | 57.0                         | 58.5                                  | 0.439                  | 0.636                                |
| Height (cm)                                 | 173.0                        | 169.0                                 | 0.199                  | 0.581                                |
| Office SBP (mm Hg)                          | 135.8                        | 134.0                                 | 0.329                  | 0.584                                |
| Office DBP (mm Hg)                          | 87.8                         | 83.8                                  | 0.272                  | 0.581                                |
| 24h ABPM SBP (mm Hg)                        | 135.5                        | 126.7                                 | 0.095                  | 0.581                                |
| 24h ABPM DBP (mm Hg)                        | 81.0                         | 78.5                                  | 0.409                  | 0.636                                |
| 24h ABPM MAP (mm Hg)                        | 106.0                        | 100.5                                 | 0.167                  | 0.581                                |
| 24h ABPM peripheral resistance (mm Hg*s/ml) | 1.3                          | 1.2                                   | 0.017                  | 0.529                                |
| SBP day (mm Hg)                             | 138.0                        | 128.0                                 | 0.264                  | 0.581                                |
| DBP day (mm Hg)                             | 83.0                         | 80.5                                  | 0.650                  | 0.718                                |
| SBP nocturnal (mm Hg)                       | 120.0                        | 117.0                                 | 0.541                  | 0.692                                |
| DBP nocturnal (mm Hg)                       | 74.0                         | 71.5                                  | 0.325                  | 0.584                                |
| Weight (kg)                                 | 96.5                         | 100.3                                 | 0.583                  | 0.715                                |
| BMI (kg/m <sup>2</sup> )                    | 32.1                         | 36.5                                  | 0.127                  | 0.581                                |
| Hip circumference (cm)                      | 117.5                        | 117.5                                 | 0.776                  | 0.827                                |
| Waist circumference (cm)                    | 111.0                        | 122.0                                 | 0.132                  | 0.581                                |
| Waist to hip ratio                          | 1.0                          | 1.0                                   | 0.223                  | 0.581                                |
| Body fat percentage (%)                     | 43.2                         | 43.6                                  | 0.477                  | 0.636                                |
| HOMA-index                                  | 2.1                          | 2.3                                   | 0.477                  | 0.636                                |
| Insulin (mU/l)                              | 9.7                          | 8.2                                   | 0.290                  | 0.581                                |
| Plasma glucose (mg/dl)                      | 95.5                         | 106.3                                 | 0.349                  | 0.588                                |
| Hb-A1C (%)                                  | 5.7                          | 5.9                                   | 0.152                  | 0.581                                |
| Hb-A1C IFCC (mmol/mol)                      | 38.6                         | 40.8                                  | 0.152                  | 0.581                                |
| Triglyceride (mg/dl)                        | 135.6                        | 153.1                                 | 0.280                  | 0.581                                |
| Cholesterol (mg/dl)                         | 230.0                        | 193.3                                 | 1.000                  | 1.000                                |
| HDL (mg/dl)                                 | 48.3                         | 48.3                                  | 0.623                  | 0.715                                |
| LDL(mg/dl)                                  | 148.8                        | 121.8                                 | 0.451                  | 0.636                                |
| LDL/HDL ratio                               | 2.7                          | 2.7                                   | 0.625                  | 0.715                                |
| CRP (mg/l)                                  | 0.2                          | 0.3                                   | 0.903                  | 0.932                                |
| IL-6 (pg/ml)                                | 2.5                          | 2.1                                   | 0.200                  | 0.581                                |
| Creatinine (mg/dl)                          | 1.0                          | 0.8                                   | 0.099                  | 0.581                                |
| eGFR Cockcroft-Gault (ml/min)               | 106.4                        | 148.2                                 | 0.230                  | 0.581                                |
