# Supplementary material for: Fasting alters the gut microbiome reducing blood pressure and body weight in metabolic syndrome patients
Source: PubMed Central journal article supplement (PMC8010079; doi:10.1038/s41467-021-22097-0), 2021-03-30
Supplement: 41467_2021_22097_MOESM13_ESM.pdf [file 41467_2021_22097_MOESM13_ESM.pdf]

**Supplementary Data 10. References for poorly characterized SCFA-producing microbes.**

| Microbe                     | Short Chain Fatty Acid produced  | Reference |
|-----------------------------|----------------------------------|-----------|
| <i>Eggerthella lenta</i>    | acetate                          | 1         |
| <i>Hungatella hathewayi</i> | acetate                          | 2, 3      |
| <i>Eubacterium rectale</i>  | butyrate                         | 4         |
| <i>Dorea longicatena</i>    | butyrate                         | 5         |
| <i>Alistipes inops</i>      | acetate                          | 6         |
| <i>Alistipes shahii</i>     | acetate, propionate              | 7         |
| <i>Pseudoflavonifactor</i>  | acetate                          | 5         |
| <i>Acidaminococcus sp.</i>  | acetate, butyrate, (propionate?) | 8,9       |

1. Wade WG, *et al.* The family Coriobacteriaceae: reclassification of *Eubacterium exiguum* (Poco *et al.* 1996) and *Peptostreptococcus heliotrinreducens* (Lanigan 1976) as *Slackia exigua* gen. nov., comb. nov. and *Slackia heliotrinreducens* gen. nov., comb. nov., and *Eubacterium lentum* (Prevot 1938) as *Eggerthella lenta* gen. nov., comb. nov. *International journal of systematic bacteriology* **49 Pt 2**, 595-600 (1999).
2. Kaur S, Yawar M, Kumar PA, Suresh K. *Hungatella effluvii* gen. nov., sp. nov., an obligately anaerobic bacterium isolated from an effluent treatment plant, and reclassification of *Clostridium hathewayi* as *Hungatella hathewayi* gen. nov., comb. nov. *International journal of systematic and evolutionary microbiology* **64**, 710-718 (2014).
3. Steer T, Collins MD, Gibson GR, Hippe H, Lawson PA. *Clostridium hathewayi* sp. nov., from human faeces. *Systematic and applied microbiology* **24**, 353-357 (2001).
4. Moens F, De Vuyst L. Inulin-type fructan degradation capacity of *Clostridium* cluster IV and XIVa butyrate-producing colon bacteria and their associated metabolic outcomes. *Beneficial microbes* **8**, 473-490 (2017).
5. Polansky O, Sekelova Z, Faldynova M, Sebkova A, Sisak F, Rychlik I. Important Metabolic Pathways and Biological Processes Expressed by Chicken Cecal Microbiota. *Applied and environmental microbiology* **82**, 1569-1576 (2015).
6. Shkoporov AN, *et al.* *Alistipes inops* sp. nov. and *Coprobacter secundus* sp. nov., isolated from human faeces. *International journal of systematic and evolutionary microbiology* **65**, 4580-4588 (2015).
7. Song Y, *et al.* *Alistipes onderdonkii* sp. nov. and *Alistipes shahii* sp. nov., of human origin. *International journal of systematic and evolutionary microbiology* **56**, 1985-1990 (2006).
8. Jumas-Bilak E, *et al.* *Acidaminococcus intestini* sp. nov., isolated from human clinical samples. *International journal of systematic and evolutionary microbiology* **57**, 2314-2319 (2007).
9. Rogosa M. *Acidaminococcus* gen. n., *Acidaminococcus fermentans* sp. n., anaerobic gram-negative diplococci using amino acids as the sole energy source for growth. *Journal of bacteriology* **98**, 756-766 (1969)
