# Supplementary material for: Fasting alters the gut microbiome reducing blood pressure and body weight in metabolic syndrome patients
Source: PubMed Central journal article supplement (PMC8010079; doi:10.1038/s41467-021-22097-0), 2021-03-30
Supplement: 41467_2021_22097_MOESM15_ESM.pdf [file 41467_2021_22097_MOESM15_ESM.pdf]

**Supplementary Data 12. Classification of the probands of the Mesnage dataset according to their BP decrease after three months.** A  $\geq 5$  mmHg decrease of the SBP at three months compared to baseline was considered to be significant.

| <b>Subject ID</b> | <b>SBP Baseline (mmHg)</b> | <b>SBP Follow-up, 3 months (mmHg)</b> | <b><math>\Delta</math>SBP Follow-up – Baseline (mmHg)</b> | <b>Classification (R=Responder, NR=Non-Responder)</b> |
|-------------------|----------------------------|---------------------------------------|-----------------------------------------------------------|-------------------------------------------------------|
| 1                 | 115                        | 117                                   | 2                                                         | NR                                                    |
| 2                 | 144                        | 129                                   | -15                                                       | R                                                     |
| 3                 | 133                        | 122                                   | -11                                                       | R                                                     |
| 4                 | 128                        | 142                                   | 14                                                        | NR                                                    |
| 5                 | 112                        | 120                                   | 8                                                         | NR                                                    |
| 6                 | 127                        | 142                                   | 15                                                        | NR                                                    |
| 7                 | 134                        | 130                                   | -4                                                        | NR                                                    |
| 8                 | 137                        | 127                                   | -10                                                       | R                                                     |
| 9                 | 135                        | 130                                   | -5                                                        | R                                                     |
| 10                | 138                        | 135                                   | -3                                                        | NR                                                    |
| 11                | 122                        | 104                                   | -18                                                       | R                                                     |
| 12                | 131                        | 134                                   | 3                                                         | NR                                                    |
| 13                | 131                        | 123                                   | -8                                                        | R                                                     |
| 14                | 96                         | 121                                   | 25                                                        | NR                                                    |
| 15                | 158                        | 138                                   | -20                                                       | R                                                     |
