# Supplementary material for: Fasting alters the gut microbiome reducing blood pressure and body weight in metabolic syndrome patients
Source: PubMed Central journal article supplement (PMC8010079; doi:10.1038/s41467-021-22097-0), 2021-03-30
Supplement: 41467_2021_22097_MOESM16_ESM.pdf [file 41467_2021_22097_MOESM16_ESM.pdf]

### Supplementary Data 13

| Reference               | Intervention                                       | Study Subjects and Design                                                                                                                      | Major Findings                                                                                                                                                                                                                                                                                                                                                                                                                                                                                                                  |
|-------------------------|----------------------------------------------------|------------------------------------------------------------------------------------------------------------------------------------------------|---------------------------------------------------------------------------------------------------------------------------------------------------------------------------------------------------------------------------------------------------------------------------------------------------------------------------------------------------------------------------------------------------------------------------------------------------------------------------------------------------------------------------------|
| Frost et al.<br>[3]     | Complex weight loss program                        | Low-calorie formula diet for six weeks, followed by nine weeks of food reintroduction in type 2 diabetic patients, N = 12.                     | <ul style="list-style-type: none"> <li>All participants lost weight during the program.</li> <li>Phylogenetic diversity increased parallel to weight loss.</li> <li><i>Collinsella</i> abundance significantly decreased by end of the study compared to baseline.</li> </ul>                                                                                                                                                                                                                                                   |
| Ozkul et al.<br>[4]     | Ramadan fasting                                    | Ramadan fasting in healthy subjects, N = 9.                                                                                                    | <ul style="list-style-type: none"> <li>Ramadan fasting did not alter alpha diversity (Shannon index) or phylogenetic diversity, but significantly changed the gut microbiome between baseline and after 29 days, according to unweighted UniFrac analysis.</li> <li>Ramadan fasting resulted in the enrichment of <i>Butyrivicoccus</i>, <i>Bacteroides</i>, <i>Faecalibacterium</i>, <i>Roseburia</i>, <i>Allobaculum</i>, <i>Eubacterium</i>, <i>Dialister</i> and <i>Erysipelotrichici</i>, compared to baseline.</li> </ul> |
| Louis et al.<br>[5]     | Complex weight loss program                        | Multidisciplinary weight-loss program lasting for 52 weeks followed by 12 months of follow-up in MetS/obese patients (N = 9, 7, respectively). | <ul style="list-style-type: none"> <li>At species level no significant difference could be observed between baseline and 24 months, yet at genera level <i>Akkermansia</i> was enriched significantly at 24 months compared to baseline.</li> <li>Patients with persistent weight loss success were enriched at baseline in <i>Alistipes</i>, <i>Pseudoflavonifractor</i>.</li> </ul>                                                                                                                                           |
| Velikonja et al.<br>[6] | Beta-glucan supplementation for four weeks         | Double blind, placebo-controlled study involving patients with MetS/ high risk for MetS, N = 43.                                               | <ul style="list-style-type: none"> <li>Beta-glucan group significantly decreased the total cholesterol.</li> <li>Body weight significantly decreased in both groups.</li> <li>Fecal propionate increased in the beta-glucan group.</li> <li>In the beta-glucan group fecal diversity and richness (Chao, Shannon, respectively) decreased upon intervention.</li> <li>Cholesterol responders showed a higher baseline abundance of <i>Akkermansia muciniphila</i> and <i>Bifidobacterium</i> spp.</li> </ul>                    |
| Roager et al.<br>[7]    | Whole grain vs. refined grain dietary intervention | Crossover clinical study with patients at risk of developing MetS with 8 weeks of intervention and 8 weeks of subsequent wash-out, N = 60.     | <ul style="list-style-type: none"> <li>Intervention did not alter glucose homeostasis or fecal microbiome.</li> <li>Whole grain diet significantly decreased body weight compared to refined grain diet.</li> <li>The whole grain intervention induced weight loss, and decreased serum IL-6 and CRP.</li> </ul>                                                                                                                                                                                                                |

|                                    |                                                                                     |                                                                                                                          |                                                                                                                                                                                                                                                                                                                                                                                                                                                                                                                                                                     |
|------------------------------------|-------------------------------------------------------------------------------------|--------------------------------------------------------------------------------------------------------------------------|---------------------------------------------------------------------------------------------------------------------------------------------------------------------------------------------------------------------------------------------------------------------------------------------------------------------------------------------------------------------------------------------------------------------------------------------------------------------------------------------------------------------------------------------------------------------|
| Liu et al.<br><b>[8]</b>           | db/db mouse experiment                                                              | 28 days of intermittent fasting in rodents.                                                                              | <ul style="list-style-type: none"> <li>• Intermittent fasting decreased obesity-induced cognitive impairment and insulin resistance.</li> <li>• Alpha diversity significantly increased and significantly changed beta-diversity</li> <li>• Intermittent fasting improved Lactobacillus and the butyrate-producer <i>Odoribacter</i> abundances, meanwhile reduced the abundance of <i>Enterococcus</i>, <i>Streptococcus</i> and an unknown <i>Enterococcaceae</i>.</li> </ul>                                                                                     |
| Kopf et al.<br><b>[9]</b>          | Whole grain, fruit-vegetable supplementation vs. refined grain diet, 3 servings/day | Randomized, parallel arm study, involving overweight or obese patients, N = 49.                                          | <ul style="list-style-type: none"> <li>• Whole grain and fruit-vegetable diet both decreased the level of serum lipopolysaccharide binding protein, and increased alpha diversity.</li> <li>• Fruit-vegetable and whole grain diet decreased serum IL-6 and TNF<math>\alpha</math> levels, respectively, and these changes were correlated with the baseline microbiome composition.</li> <li>• Fruit-vegetable group increased alpha diversity.</li> <li>• BMI did not change significantly in any groups at the end of the study compared to baseline.</li> </ul> |
| Guevara-Cruz et al.<br><b>[10]</b> | Complex weight loss, low saturated fat, 500 kcal/day dietary intervention           | 75-day long complex weight loss intervention program involving a MetS subpopulation of a cross-sectional study, N = 146. | <ul style="list-style-type: none"> <li>• Intervention significantly decreased gut dysbiosis and increased the abundance of <i>Akkermansia muciniphila</i> and <i>F. parusnitzii</i> and with a reduction of <i>Prevotella/Bacteroides</i> ratio.</li> <li>• The intervention improved the clinical phenotype; blood pressure, BMI, waist circumference, HOMA, HbA1c, LDL-c, glucose intolerance, LPS, BCAA decreased.</li> </ul>                                                                                                                                    |
